# Supplementary material
Source: ML conference proceedings conference paper supplement (https://openreview.net/forum?id=vfju5hjrJw)
Supplement: supplementary_material [file attachment]

## Supplement Materials

- **URL to website/platform of ComBack.**  
<https://huggingface.co/datasets/docz-ict/ComBack>.
- **URL to Croissant metadata record documenting ComBack.**  
<https://huggingface.co/api/datasets/docz-ict/ComBack/croissant>.
- **Author statement.**  
 We bear all responsibility in case of violation of rights.
- **Hosting Platform of ComBack.**  
<https://huggingface.co>.
- **Licensing of ComBack.**  
 ComBack: A Versatile Dataset for Enhancing Compiler Backend Development Efficiency © 2024 by Ming Zhong is licensed under CC BY 4.0.
- **Maintance Plan.**  
 The owner and his team will be responsible for maintain the dataset. They will regularly extend the dataset with backends in newly released GCC, LLVM and open-sourced projects. As the dataset has been open-sourced at Huggingface, it will be easy to recover from former version when issues arise.
- **URL to fine-tuned models and scripts to reproduce experimental results.**  
[https://huggingface.co/docz-ict/ComBack\\_Models](https://huggingface.co/docz-ict/ComBack_Models).

## Links to 317 open-sourced GitHub repositories in Sec. 3.1

### SOURCE LINKS

| Idx | Repository                      | URL                                                                                                                                             |
|-----|---------------------------------|-------------------------------------------------------------------------------------------------------------------------------------------------|
| 0   | GCC Released                    | <a href="https://www.gnu.org/prep/ftp.html">https://www.gnu.org/prep/ftp.html</a>                                                               |
| 1   | GCC-FrontEnd                    | <a href="https://github.com/CdTCzech/GCC-FrontEnd">https://github.com/CdTCzech/GCC-FrontEnd</a>                                                 |
| 2   | 7bgzf                           | <a href="https://github.com/cielavenir/7bgzf">https://github.com/cielavenir/7bgzf</a>                                                           |
| 3   | cpp.jit                         | <a href="https://github.com/DavidPfander-UniStuttgart/cppjit">https://github.com/DavidPfander-UniStuttgart/cppjit</a>                           |
| 4   | gcc-issues                      | <a href="https://github.com/erthink/gcc-issues">https://github.com/erthink/gcc-issues</a>                                                       |
| 5   | gcc-vc4                         | <a href="https://github.com/felipealmeida/gcc-vc4">https://github.com/felipealmeida/gcc-vc4</a>                                                 |
| 6   | gcc                             | <a href="https://github.com/gcouchinoux/gcc">https://github.com/gcouchinoux/gcc</a>                                                             |
| 7   | gcc-backend                     | <a href="https://github.com/Kanyesigye2002/gcc-backend">https://github.com/Kanyesigye2002/gcc-backend</a>                                       |
| 8   | pdp10-gcc                       | <a href="https://github.com/larsbrinkhoff/pdp10-gcc">https://github.com/larsbrinkhoff/pdp10-gcc</a>                                             |
| 9   | pdp10-gcc-test                  | <a href="https://github.com/larsbrinkhoff/pdp10-gcc-test">https://github.com/larsbrinkhoff/pdp10-gcc-test</a>                                   |
| 10  | gcc                             | <a href="https://github.com/MoSync/gcc">https://github.com/MoSync/gcc</a>                                                                       |
| 11  | arm.js                          | <a href="https://github.com/pipcet/asmjs">https://github.com/pipcet/asmjs</a>                                                                   |
| 12  | dragonegg                       | <a href="https://github.com/pld-linux/dragonegg">https://github.com/pld-linux/dragonegg</a>                                                     |
| 13  | GCC-HIP                         | <a href="https://github.com/ProGTX/GCC-HIP">https://github.com/ProGTX/GCC-HIP</a>                                                               |
| 14  | docker_ghdl                     | <a href="https://github.com/RafaelMaychmaz/docker_ghdl">https://github.com/RafaelMaychmaz/docker_ghdl</a>                                       |
| 15  | eco32-gcc                       | <a href="https://github.com/skristiansson/eco32-gcc">https://github.com/skristiansson/eco32-gcc</a>                                             |
| 16  | gigachad-backend                | <a href="https://github.com/smalljustin/gigachad-backend">https://github.com/smalljustin/gigachad-backend</a>                                   |
| 17  | programming-platform-backend-vm | <a href="https://github.com/techsyndicate/programming-platform-backend-vm">https://github.com/techsyndicate/programming-platform-backend-vm</a> |
| 18  | backend                         | <a href="https://github.com/vicenCA/backend">https://github.com/vicenCA/backend</a>                                                             |
| 19  | sparse                          | <a href="https://github.com/yersinia/sparse">https://github.com/yersinia/sparse</a>                                                             |
| 20  | z8k-gcc                         | <a href="https://github.com/z8k/z8k-gcc">https://github.com/z8k/z8k-gcc</a>                                                                     |
| 21  | .config                         | <a href="https://github.com/zszszszsz/.config">https://github.com/zszszszsz/.config</a>                                                         |
| 0   | LLVM Released                   | <a href="https://releases.llvm.org/download.html">https://releases.llvm.org/download.html</a>                                                   |
| 1   | ollvm-12.x                      | <a href="https://github.com/0x3f97/ollvm-12.x">https://github.com/0x3f97/ollvm-12.x</a>                                                         |
| 2   | dagger                          | <a href="https://github.com/ahmedbougacha/dagger">https://github.com/ahmedbougacha/dagger</a>                                                   |
| 3   | LLVM-TMS320C64X                 | <a href="https://github.com/alexjordan/LLVM-TMS320C64X">https://github.com/alexjordan/LLVM-TMS320C64X</a>                                       |
| 4   | ollvm5.0.1                      | <a href="https://github.com/AllocAndInit/ollvm5.0.1">https://github.com/AllocAndInit/ollvm5.0.1</a>                                             |
| 5   | llvmbuild                       | <a href="https://github.com/Altiscale/llvmbuild">https://github.com/Altiscale/llvmbuild</a>                                                     |
| 6   | goron                           | <a href="https://github.com/amimo/goron">https://github.com/amimo/goron</a>                                                                     |
| 7   | EuroLLVM2018Hack                | <a href="https://github.com/AnastasiaStulova/EuroLLVM2018Hack">https://github.com/AnastasiaStulova/EuroLLVM2018Hack</a>                         |
| 8   | hardened-llvm                   | <a href="https://github.com/andreasdotorg/hardened-llvm">https://github.com/andreasdotorg/hardened-llvm</a>                                     |
| 9   | llvm_clang_GSoC                 | <a href="https://github.com/andrewmw94/llvm_clang_GSoC">https://github.com/andrewmw94/llvm_clang_GSoC</a>                                       |
| 10  | external_llvm                   | <a href="https://github.com/AOKP/external_llvm">https://github.com/AOKP/external_llvm</a>                                                       |
| 11  | llvm-project-v5                 | <a href="https://github.com/apple/llvm-project-v5">https://github.com/apple/llvm-project-v5</a>                                                 |
| 12  | swift-llvm                      | <a href="https://github.com/apple/swift-llvm">https://github.com/apple/swift-llvm</a>                                                           |
| 13  | llvmCore                        | <a href="https://github.com/apple-oss-distributions/llvmCore">https://github.com/apple-oss-distributions/llvmCore</a>                           |

Continued on next page

– continued from previous page

| Idx | Repository                             | URL                                                                                                                                                     |
|-----|----------------------------------------|---------------------------------------------------------------------------------------------------------------------------------------------------------|
| 14  | llvm-color-flip                        | <a href="https://github.com/arabori/llvm-color-flip">https://github.com/arabori/llvm-color-flip</a>                                                     |
| 15  | llvm-openrisc                          | <a href="https://github.com/asl/llvm-openrisc">https://github.com/asl/llvm-openrisc</a>                                                                 |
| 16  | mxkasan_llvm                           | <a href="https://github.com/attilaszia/mxkasan_llvm">https://github.com/attilaszia/mxkasan_llvm</a>                                                     |
| 17  | llvm-late-safepoint-placement          | <a href="https://github.com/AzulSystems/llvm-late-safepoint-placement">https://github.com/AzulSystems/llvm-late-safepoint-placement</a>                 |
| 18  | llvm_upt                               | <a href="https://github.com/Azurewyl/llvm_upt">https://github.com/Azurewyl/llvm_upt</a>                                                                 |
| 19  | mehari-llvm                            | <a href="https://github.com/BBSSnowball/mehari-llvm">https://github.com/BBSSnowball/mehari-llvm</a>                                                     |
| 20  | llvm-gbz80                             | <a href="https://github.com/Bevinsky/llvm-gbz80">https://github.com/Bevinsky/llvm-gbz80</a>                                                             |
| 21  | llvm-stm8                              | <a href="https://github.com/bhav97/llvm-stm8">https://github.com/bhav97/llvm-stm8</a>                                                                   |
| 22  | llvm-clang-PRETC                       | <a href="https://github.com/blickly/llvm-clang-PRETC">https://github.com/blickly/llvm-clang-PRETC</a>                                                   |
| 23  | platform_external_llvm80               | <a href="https://github.com/BlissOS/platform_external_llvm80">https://github.com/BlissOS/platform_external_llvm80</a>                                   |
| 24  | platform_external_llvm70               | <a href="https://github.com/BlissRoms-x86/platform_external_llvm70">https://github.com/BlissRoms-x86/platform_external_llvm70</a>                       |
| 25  | llvm-307315                            | <a href="https://github.com/bobzsj87/llvm-307315">https://github.com/bobzsj87/llvm-307315</a>                                                           |
| 26  | llvm-zipper-prototype                  | <a href="https://github.com/bogner/llvm-zipper-prototype">https://github.com/bogner/llvm-zipper-prototype</a>                                           |
| 27  | multicore-optimization                 | <a href="https://github.com/Bootz/multicore-optimization">https://github.com/Bootz/multicore-optimization</a>                                           |
| 28  | pdse                                   | <a href="https://github.com/bryant/pdse">https://github.com/bryant/pdse</a>                                                                             |
| 29  | dlx                                    | <a href="https://github.com/buresm11/dlx">https://github.com/buresm11/dlx</a>                                                                           |
| 30  | llvm-capstone                          | <a href="https://github.com/capstone-engine/llvm-capstone">https://github.com/capstone-engine/llvm-capstone</a>                                         |
| 31  | llvm-vp                                | <a href="https://github.com/cdl-saarland/llvm-vp">https://github.com/cdl-saarland/llvm-vp</a>                                                           |
| 32  | llvm-cgo-2015                          | <a href="https://github.com/chandlerc/llvm-cgo-2015">https://github.com/chandlerc/llvm-cgo-2015</a>                                                     |
| 33  | cmplrstudy                             | <a href="https://github.com/changeyourname/cmplrstudy">https://github.com/changeyourname/cmplrstudy</a>                                                 |
| 34  | llvm-project-legacy                    | <a href="https://github.com/chapuni/llvm-project-legacy">https://github.com/chapuni/llvm-project-legacy</a>                                             |
| 35  | checkedc-llvm-project                  | <a href="https://github.com/checkedc/checkedc-llvm-project">https://github.com/checkedc/checkedc-llvm-project</a>                                       |
| 36  | LLVM-VideoCore4                        | <a href="https://github.com/christinaa/LLVM-VideoCore4">https://github.com/christinaa/LLVM-VideoCore4</a>                                               |
| 37  | llvm-optimized                         | <a href="https://github.com/chris-wood/llvm-optimized">https://github.com/chris-wood/llvm-optimized</a>                                                 |
| 38  | rust-llvm-xtensa                       | <a href="https://github.com/ciniml/rust-llvm-xtensa">https://github.com/ciniml/rust-llvm-xtensa</a>                                                     |
| 39  | llvm_trunk                             | <a href="https://github.com/clang-omp/llvm_trunk">https://github.com/clang-omp/llvm_trunk</a>                                                           |
| 40  | llvm-xtensa                            | <a href="https://github.com/code0100fun/llvm-xtensa">https://github.com/code0100fun/llvm-xtensa</a>                                                     |
| 41  | llvm-leg                               | <a href="https://github.com/codeplaysoftware/llvm-leg">https://github.com/codeplaysoftware/llvm-leg</a>                                                 |
| 42  | sycl-for-cuda                          | <a href="https://github.com/codeplaysoftware/sycl-for-cuda">https://github.com/codeplaysoftware/sycl-for-cuda</a>                                       |
| 43  | llvm-z80-backend                       | <a href="https://github.com/Codetector1374/llvm-z80-backend">https://github.com/Codetector1374/llvm-z80-backend</a>                                     |
| 44  | llvm-rv                                | <a href="https://github.com/compiler-dev/llvm-rv">https://github.com/compiler-dev/llvm-rv</a>                                                           |
| 45  | llvm-cjg                               | <a href="https://github.com/connorjan/llvm-cjg">https://github.com/connorjan/llvm-cjg</a>                                                               |
| 46  | DuroHLS-llvm                           | <a href="https://github.com/corelab-src/DuroHLS-llvm">https://github.com/corelab-src/DuroHLS-llvm</a>                                                   |
| 47  | android-toolchain-llvm-3-8             | <a href="https://github.com/crystax/android-toolchain-llvm-3-8">https://github.com/crystax/android-toolchain-llvm-3-8</a>                               |
| 48  | openbox_external_llvm                  | <a href="https://github.com/cubieboard/openbox_external_llvm">https://github.com/cubieboard/openbox_external_llvm</a>                                   |
| 49  | android_external_llvm                  | <a href="https://github.com/CyanogenMod/android_external_llvm">https://github.com/CyanogenMod/android_external_llvm</a>                                 |
| 50  | fuzzcoin-llvm                          | <a href="https://github.com/daehee87/fuzzcoin-llvm">https://github.com/daehee87/fuzzcoin-llvm</a>                                                       |
| 51  | llvm-riscv-backend                     | <a href="https://github.com/DailinH/llvm-riscv-backend">https://github.com/DailinH/llvm-riscv-backend</a>                                               |
| 52  | android-platform-external-llvm         | <a href="https://github.com/dalinaum/android-platform-external-llvm">https://github.com/dalinaum/android-platform-external-llvm</a>                     |
| 53  | darling-llvmCore                       | <a href="https://github.com/darlinghq/darling-llvmCore">https://github.com/darlinghq/darling-llvmCore</a>                                               |
| 54  | minsfi-llvm                            | <a href="https://github.com/davidbrazdil/minsfi-llvm">https://github.com/davidbrazdil/minsfi-llvm</a>                                                   |
| 55  | pnac1-llvm                             | <a href="https://github.com/davidbrazdil/pnac1-llvm">https://github.com/davidbrazdil/pnac1-llvm</a>                                                     |
| 56  | llvm-gvn-rewrite                       | <a href="https://github.com/dberlin/llvm-gvn-rewrite">https://github.com/dberlin/llvm-gvn-rewrite</a>                                                   |
| 57  | DeClang                                | <a href="https://github.com/DeNA/DeClang">https://github.com/DeNA/DeClang</a>                                                                           |
| 58  | Mitigating-Spectre-Meltdown            | <a href="https://github.com/Devansh-Agarwal/Mitigating-Spectre-Meltdown">https://github.com/Devansh-Agarwal/Mitigating-Spectre-Meltdown</a>             |
| 59  | llvm-metadataburn                      | <a href="https://github.com/djolertrk/llvm-metadataburn">https://github.com/djolertrk/llvm-metadataburn</a>                                             |
| 60  | llvm-js-backend                        | <a href="https://github.com/dmlap/llvm-js-backend">https://github.com/dmlap/llvm-js-backend</a>                                                         |
| 61  | fracture                               | <a href="https://github.com/draperlaboratory/fracture">https://github.com/draperlaboratory/fracture</a>                                                 |
| 62  | llvm-cbe                               | <a href="https://github.com/draperlaboratory/llvm-cbe">https://github.com/draperlaboratory/llvm-cbe</a>                                                 |
| 63  | llvm12_960                             | <a href="https://github.com/DrItanium/llvm12_960">https://github.com/DrItanium/llvm12_960</a>                                                           |
| 64  | llvm36_1                               | <a href="https://github.com/drmeister/llvm36_1">https://github.com/drmeister/llvm36_1</a>                                                               |
| 65  | llvm-z80                               | <a href="https://github.com/earl1k/llvm-z80">https://github.com/earl1k/llvm-z80</a>                                                                     |
| 66  | pulp-llvm                              | <a href="https://github.com/ekut-es/pulp-llvm">https://github.com/ekut-es/pulp-llvm</a>                                                                 |
| 67  | aap-llvm                               | <a href="https://github.com/embecosm/aap-llvm">https://github.com/embecosm/aap-llvm</a>                                                                 |
| 68  | llvm-othergen                          | <a href="https://github.com/embecosm/llvm-othergen">https://github.com/embecosm/llvm-othergen</a>                                                       |
| 69  | YANSOllvm                              | <a href="https://github.com/emc2314/YANSOllvm">https://github.com/emc2314/YANSOllvm</a>                                                                 |
| 70  | emscripten-fastcomp                    | <a href="https://github.com/emscripten-core/emscripten-fastcomp">https://github.com/emscripten-core/emscripten-fastcomp</a>                             |
| 71  | llvm-copy                              | <a href="https://github.com/Eric-is-good/llvm-copy">https://github.com/Eric-is-good/llvm-copy</a>                                                       |
| 72  | llvm.mix                               | <a href="https://github.com/eush77/llvm.mix">https://github.com/eush77/llvm.mix</a>                                                                     |
| 73  | Kylin-llvm-obfuscator                  | <a href="https://github.com/exorxw/Kylin-llvm-obfuscator">https://github.com/exorxw/Kylin-llvm-obfuscator</a>                                           |
| 74  | iec-61131_new                          | <a href="https://github.com/fanfuqiang/iec-61131_new">https://github.com/fanfuqiang/iec-61131_new</a>                                                   |
| 75  | Pluto-Obfuscator                       | <a href="https://github.com/fc777888/Pluto-Obfuscator">https://github.com/fc777888/Pluto-Obfuscator</a>                                                 |
| 76  | ri5cy-llvm                             | <a href="https://github.com/federeghe/ri5cy-llvm">https://github.com/federeghe/ri5cy-llvm</a>                                                           |
| 77  | llvm-skir                              | <a href="https://github.com/fifield/llvm-skir">https://github.com/fifield/llvm-skir</a>                                                                 |
| 78  | FISC-LLVM                              | <a href="https://github.com/FISC-Project/FISC-LLVM">https://github.com/FISC-Project/FISC-LLVM</a>                                                       |
| 79  | LLVM-Latency-Critical-Load-Replacement | <a href="https://github.com/fjrobinson/LLVM-Latency-Critical-Load-Replacement">https://github.com/fjrobinson/LLVM-Latency-Critical-Load-Replacement</a> |
| 80  | flang7                                 | <a href="https://github.com/flang-cavium/flang7">https://github.com/flang-cavium/flang7</a>                                                             |
| 81  | flang9                                 | <a href="https://github.com/flang-cavium/flang9">https://github.com/flang-cavium/flang9</a>                                                             |
| 82  | classic-flang-llvm-project             | <a href="https://github.com/flang-compiler/classic-flang-llvm-project">https://github.com/flang-compiler/classic-flang-llvm-project</a>                 |
| 83  | j2-llvm                                | <a href="https://github.com/francism/j2-llvm">https://github.com/francism/j2-llvm</a>                                                                   |
| 84  | llvm_mpi_checks                        | <a href="https://github.com/frankroeder/llvm_mpi_checks">https://github.com/frankroeder/llvm_mpi_checks</a>                                             |
| 85  | llvm-leg                               | <a href="https://github.com/frasercmck/llvm-leg">https://github.com/frasercmck/llvm-leg</a>                                                             |
| 86  | iota-llvm                              | <a href="https://github.com/froggey/iota-llvm">https://github.com/froggey/iota-llvm</a>                                                                 |
| 87  | llvm-tlcs900                           | <a href="https://github.com/fromGoogleCode/llvm-tlcs900">https://github.com/fromGoogleCode/llvm-tlcs900</a>                                             |
| 88  | teak-llvm                              | <a href="https://github.com/Gericom/teak-llvm">https://github.com/Gericom/teak-llvm</a>                                                                 |
| 89  | llvm-monorepo                          | <a href="https://github.com/glaubitz/llvm-monorepo">https://github.com/glaubitz/llvm-monorepo</a>                                                       |
| 90  | llvm-java                              | <a href="https://github.com/Glavo/llvm-java">https://github.com/Glavo/llvm-java</a>                                                                     |
| 91  | llvm-propeller                         | <a href="https://github.com/google/llvm-propeller">https://github.com/google/llvm-propeller</a>                                                         |

Continued on next page

– continued from previous page

| Idx | Repository                           | URL                                                                                                                                                         |
|-----|--------------------------------------|-------------------------------------------------------------------------------------------------------------------------------------------------------------|
| 92  | Armariris                            | <a href="https://github.com/GoSSIP-SJTU/Armariris">https://github.com/GoSSIP-SJTU/Armariris</a>                                                             |
| 93  | MinimumRegisterInstructionSequencing | <a href="https://github.com/gshashidhar125/MinimumRegisterInstructionSequencing">https://github.com/gshashidhar125/MinimumRegisterInstructionSequencing</a> |
| 94  | llvm-l8080                           | <a href="https://github.com/gt-retro-computing/llvm-l8080">https://github.com/gt-retro-computing/llvm-l8080</a>                                             |
| 95  | tpc_llvm                             | <a href="https://github.com/HabanaAI/tpc_llvm">https://github.com/HabanaAI/tpc_llvm</a>                                                                     |
| 96  | LLVM6_HSLP                           | <a href="https://github.com/herjmo0/LLVM6_HSLP">https://github.com/herjmo0/LLVM6_HSLP</a>                                                                   |
| 97  | EPOXY-llvm                           | <a href="https://github.com/HexHive/EPOXY-llvm">https://github.com/HexHive/EPOXY-llvm</a>                                                                   |
| 98  | llvm-bgq                             | <a href="https://github.com/hfinkel/llvm-bgq">https://github.com/hfinkel/llvm-bgq</a>                                                                       |
| 99  | llvm-lfort                           | <a href="https://github.com/hfinkel/llvm-lfort">https://github.com/hfinkel/llvm-lfort</a>                                                                   |
| 100 | llvm-project-csp                     | <a href="https://github.com/hfinkel/llvm-project-csp">https://github.com/hfinkel/llvm-project-csp</a>                                                       |
| 101 | llvm-project-cxxjit                  | <a href="https://github.com/hfinkel/llvm-project-cxxjit">https://github.com/hfinkel/llvm-project-cxxjit</a>                                                 |
| 102 | PJ_O-LLVM                            | <a href="https://github.com/HighW4y2H3ll/PJ_O-LLVM">https://github.com/HighW4y2H3ll/PJ_O-LLVM</a>                                                           |
| 103 | llvm-yacahp                          | <a href="https://github.com/hiromi-mi/llvm-yacahp">https://github.com/hiromi-mi/llvm-yacahp</a>                                                             |
| 104 | HLC-HSAIL-Development-LLVM           | <a href="https://github.com/HSAFoundation/HLC-HSAIL-Development-LLVM">https://github.com/HSAFoundation/HLC-HSAIL-Development-LLVM</a>                       |
| 105 | ios-analysis-llvmslicer              | <a href="https://github.com/IAIK/ios-analysis-llvmslicer">https://github.com/IAIK/ios-analysis-llvmslicer</a>                                               |
| 106 | LLVM-Loop-Profiler                   | <a href="https://github.com/IITH-Compilers/LLVM-Loop-Profiler">https://github.com/IITH-Compilers/LLVM-Loop-Profiler</a>                                     |
| 107 | LLVM-Loop-Profiler_MonoRepo          | <a href="https://github.com/IITH-Compilers/LLVM-Loop-Profiler_MonoRepo">https://github.com/IITH-Compilers/LLVM-Loop-Profiler_MonoRepo</a>                   |
| 108 | llvmhls                              | <a href="https://github.com/infinioce/llvmhls">https://github.com/infinioce/llvmhls</a>                                                                     |
| 109 | llvm_bpf                             | <a href="https://github.com/iovisor-obsolete/llvm_bpf">https://github.com/iovisor-obsolete/llvm_bpf</a>                                                     |
| 110 | c910-llvm                            | <a href="https://github.com/isrc-cas/c910-llvm">https://github.com/isrc-cas/c910-llvm</a>                                                                   |
| 111 | flounder                             | <a href="https://github.com/isrc-cas/flounder">https://github.com/isrc-cas/flounder</a>                                                                     |
| 112 | riscv-backport-llvm8                 | <a href="https://github.com/isrc-cas/riscv-backport-llvm8">https://github.com/isrc-cas/riscv-backport-llvm8</a>                                             |
| 113 | LLVMBasedAsmGenerator                | <a href="https://github.com/ivankrylov/LLVMBasedAsmGenerator">https://github.com/ivankrylov/LLVMBasedAsmGenerator</a>                                       |
| 114 | Cpu0-LLVM-9.0                        | <a href="https://github.com/Jackie-Linzz/Cpu0-LLVM-9.0">https://github.com/Jackie-Linzz/Cpu0-LLVM-9.0</a>                                                   |
| 115 | qt210_ics_external_llvm              | <a href="https://github.com/jackyh/qt210_ics_external_llvm">https://github.com/jackyh/qt210_ics_external_llvm</a>                                           |
| 116 | llvm-z80                             | <a href="https://github.com/jacobly0/llvm-z80">https://github.com/jacobly0/llvm-z80</a>                                                                     |
| 117 | llvm-training                        | <a href="https://github.com/jaebaek/llvm-training">https://github.com/jaebaek/llvm-training</a>                                                             |
| 118 | sic-llvm                             | <a href="https://github.com/jakoberzar/sic-llvm">https://github.com/jakoberzar/sic-llvm</a>                                                                 |
| 119 | llvm-snes                            | <a href="https://github.com/jaywuul/llvm-snes">https://github.com/jaywuul/llvm-snes</a>                                                                     |
| 120 | llvm_jvm                             | <a href="https://github.com/jbhateja/llvm_jvm">https://github.com/jbhateja/llvm_jvm</a>                                                                     |
| 121 | NyuziToolchain                       | <a href="https://github.com/jbush001/NyuziToolchain">https://github.com/jbush001/NyuziToolchain</a>                                                         |
| 122 | llvm-work                            | <a href="https://github.com/jdmdj/llvm-work">https://github.com/jdmdj/llvm-work</a>                                                                         |
| 123 | llvm-65816                           | <a href="https://github.com/jeremysrand/llvm-65816">https://github.com/jeremysrand/llvm-65816</a>                                                           |
| 124 | dist-llvm                            | <a href="https://github.com/jhoush/dist-llvm">https://github.com/jhoush/dist-llvm</a>                                                                       |
| 125 | intflow-llvm                         | <a href="https://github.com/jikk/intflow-llvm">https://github.com/jikk/intflow-llvm</a>                                                                     |
| 126 | llvm-research                        | <a href="https://github.com/johngarrett/llvm-research">https://github.com/johngarrett/llvm-research</a>                                                     |
| 127 | llvm-project-with-mlir               | <a href="https://github.com/joker-eph/llvm-project-with-mlir">https://github.com/joker-eph/llvm-project-with-mlir</a>                                       |
| 128 | llvm-unified                         | <a href="https://github.com/joker-eph/llvm-unified">https://github.com/joker-eph/llvm-unified</a>                                                           |
| 129 | lbd                                  | <a href="https://github.com/Jonathan2251/lbd">https://github.com/Jonathan2251/lbd</a>                                                                       |
| 130 | msp430-llvm                          | <a href="https://github.com/jozefl/msp430-llvm">https://github.com/jozefl/msp430-llvm</a>                                                                   |
| 131 | llvm36lm32                           | <a href="https://github.com/jpbonn/llvm36lm32">https://github.com/jpbonn/llvm36lm32</a>                                                                     |
| 132 | llvm-detex                           | <a href="https://github.com/jsren/llvm-detex">https://github.com/jsren/llvm-detex</a>                                                                       |
| 133 | AutoPriv                             | <a href="https://github.com/jtcriswell/AutoPriv">https://github.com/jtcriswell/AutoPriv</a>                                                                 |
| 134 | LLVMTutorial                         | <a href="https://github.com/jtcriswell/LLVMTutorial">https://github.com/jtcriswell/LLVMTutorial</a>                                                         |
| 135 | safeccode-llvm37                     | <a href="https://github.com/jtcriswell/safeccode-llvm37">https://github.com/jtcriswell/safeccode-llvm37</a>                                                 |
| 136 | llvm-cbe                             | <a href="https://github.com/JuliaHubOSS/llvm-cbe">https://github.com/JuliaHubOSS/llvm-cbe</a>                                                               |
| 137 | float-compare-pass                   | <a href="https://github.com/jvstech/float-compare-pass">https://github.com/jvstech/float-compare-pass</a>                                                   |
| 138 | llvm-toolchain                       | <a href="https://github.com/jvstech/llvm-toolchain">https://github.com/jvstech/llvm-toolchain</a>                                                           |
| 139 | CETS-llvm8                           | <a href="https://github.com/jzhou76/CETS-llvm8">https://github.com/jzhou76/CETS-llvm8</a>                                                                   |
| 140 | avr-llvm                             | <a href="https://github.com/kaomoneus/avr-llvm">https://github.com/kaomoneus/avr-llvm</a>                                                                   |
| 141 | ghc-llvm                             | <a href="https://github.com/kavon/ghc-llvm">https://github.com/kavon/ghc-llvm</a>                                                                           |
| 142 | LLVM-SPIRV-Backend                   | <a href="https://github.com/KhronosGroup/LLVM-SPIRV-Backend">https://github.com/KhronosGroup/LLVM-SPIRV-Backend</a>                                         |
| 143 | SPIRV-LLVM                           | <a href="https://github.com/KhronosGroup/SPIRV-LLVM">https://github.com/KhronosGroup/SPIRV-LLVM</a>                                                         |
| 144 | llvm-js                              | <a href="https://github.com/kripen/llvm-js">https://github.com/kripen/llvm-js</a>                                                                           |
| 145 | llvm-js-2                            | <a href="https://github.com/kripen/llvm-js-2">https://github.com/kripen/llvm-js-2</a>                                                                       |
| 146 | llvm-clang-4.0.1                     | <a href="https://github.com/kylewu11/llvm-clang-4.0.1">https://github.com/kylewu11/llvm-clang-4.0.1</a>                                                     |
| 147 | kitsune-old                          | <a href="https://github.com/lanl/kitsune-old">https://github.com/lanl/kitsune-old</a>                                                                       |
| 148 | cheerp-compiler                      | <a href="https://github.com/leaningtech/cheerp-compiler">https://github.com/leaningtech/cheerp-compiler</a>                                                 |
| 149 | cheerp-llvm                          | <a href="https://github.com/leaningtech/cheerp-llvm">https://github.com/leaningtech/cheerp-llvm</a>                                                         |
| 150 | agc-llvm                             | <a href="https://github.com/lewis-revill/agc-llvm">https://github.com/lewis-revill/agc-llvm</a>                                                             |
| 151 | lldb-d                               | <a href="https://github.com/ljmf00/lldb-d">https://github.com/ljmf00/lldb-d</a>                                                                             |
| 152 | llvm-project-staging                 | <a href="https://github.com/llvm/llvm-project-staging">https://github.com/llvm/llvm-project-staging</a>                                                     |
| 153 | llvm-depu16                          | <a href="https://github.com/llvm-depu16/llvm-depu16">https://github.com/llvm-depu16/llvm-depu16</a>                                                         |
| 154 | custom-llvm2                         | <a href="https://github.com/llvm-faultinjector/custom-llvm2">https://github.com/llvm-faultinjector/custom-llvm2</a>                                         |
| 155 | llvm-legacy-branches                 | <a href="https://github.com/llvm-git-prototype/llvm-legacy-branches">https://github.com/llvm-git-prototype/llvm-legacy-branches</a>                         |
| 156 | llvm-mos                             | <a href="https://github.com/llvm-mos/llvm-mos">https://github.com/llvm-mos/llvm-mos</a>                                                                     |
| 157 | riscv-llvm                           | <a href="https://github.com/lowRISC/riscv-llvm">https://github.com/lowRISC/riscv-llvm</a>                                                                   |
| 158 | riscv-llvm-integration               | <a href="https://github.com/lowRISC/riscv-llvm-integration">https://github.com/lowRISC/riscv-llvm-integration</a>                                           |
| 159 | llvm-to-snes                         | <a href="https://github.com/luizperes/llvm-to-snes">https://github.com/luizperes/llvm-to-snes</a>                                                           |
| 160 | fineibt_llvm                         | <a href="https://github.com/lvwr/fineibt_llvm">https://github.com/lvwr/fineibt_llvm</a>                                                                     |
| 161 | llvm-opt-ssapre                      | <a href="https://github.com/m4yers/llvm-opt-ssapre">https://github.com/m4yers/llvm-opt-ssapre</a>                                                           |
| 162 | M680x0-llvm                          | <a href="https://github.com/M680x0/M680x0-llvm">https://github.com/M680x0/M680x0-llvm</a>                                                                   |
| 163 | mageec-llvm                          | <a href="https://github.com/mageec/mageec-llvm">https://github.com/mageec/mageec-llvm</a>                                                                   |
| 164 | mina32-llvm                          | <a href="https://github.com/marysaka/mina32-llvm">https://github.com/marysaka/mina32-llvm</a>                                                               |
| 165 | mclinker                             | <a href="https://github.com/mclinker/mclinker">https://github.com/mclinker/mclinker</a>                                                                     |
| 166 | llvm-parabix                         | <a href="https://github.com/mendlin/llvm-parabix">https://github.com/mendlin/llvm-parabix</a>                                                               |
| 167 | platform_external_llvm8              | <a href="https://github.com/michalgr/platform_external_llvm8">https://github.com/michalgr/platform_external_llvm8</a>                                       |
| 168 | llvmCore-3425.0.36                   | <a href="https://github.com/MiclausCorp/llvmCore-3425.0.36">https://github.com/MiclausCorp/llvmCore-3425.0.36</a>                                           |
| 169 | checkedc-llvm                        | <a href="https://github.com/microsoft/checkedc-llvm">https://github.com/microsoft/checkedc-llvm</a>                                                         |

Continued on next page

– continued from previous page

| Idx | Repository                     | URL                                                                                                                                               |
|-----|--------------------------------|---------------------------------------------------------------------------------------------------------------------------------------------------|
| 170 | DirectXShaderCompiler          | <a href="https://github.com/microsoft/DirectXShaderCompiler">https://github.com/microsoft/DirectXShaderCompiler</a>                               |
| 171 | llvm-spirv                     | <a href="https://github.com/MixmasterFresh/llvm-spirv">https://github.com/MixmasterFresh/llvm-spirv</a>                                           |
| 172 | llvm-lm32                      | <a href="https://github.com/m-labs/llvm-lm32">https://github.com/m-labs/llvm-lm32</a>                                                             |
| 173 | linux-packaging-mono-llvm      | <a href="https://github.com/mono/linux-packaging-mono-llvm">https://github.com/mono/linux-packaging-mono-llvm</a>                                 |
| 174 | llvm-axa-backend               | <a href="https://github.com/mortie/llvm-axa-backend">https://github.com/mortie/llvm-axa-backend</a>                                               |
| 175 | llvm-orihime                   | <a href="https://github.com/MosakujiHokuto/llvm-orihime">https://github.com/MosakujiHokuto/llvm-orihime</a>                                       |
| 176 | smm_llvm_obsolete              | <a href="https://github.com/MPSLab-ASU/smm_llvm_obsolete">https://github.com/MPSLab-ASU/smm_llvm_obsolete</a>                                     |
| 177 | IDULLVM                        | <a href="https://github.com/n01e0/IDULLVM">https://github.com/n01e0/IDULLVM</a>                                                                   |
| 178 | llvm-project-nested-funcs      | <a href="https://github.com/navdeepkk/llvm-project-nested-funcs">https://github.com/navdeepkk/llvm-project-nested-funcs</a>                       |
| 179 | Obvious                        | <a href="https://github.com/nimroddpar/Obvious">https://github.com/nimroddpar/Obvious</a>                                                         |
| 180 | tic64x-llvm-7.1                | <a href="https://github.com/nkim-bitzap/tic64x-llvm-7.1">https://github.com/nkim-bitzap/tic64x-llvm-7.1</a>                                       |
| 181 | xtensa-llvm-7.1                | <a href="https://github.com/nkim-bitzap/xtensa-llvm-7.1">https://github.com/nkim-bitzap/xtensa-llvm-7.1</a>                                       |
| 182 | backend-support                | <a href="https://github.com/normanrink/backend-support">https://github.com/normanrink/backend-support</a>                                         |
| 183 | llvm-syntax-macros             | <a href="https://github.com/normanrink/llvm-syntax-macros">https://github.com/normanrink/llvm-syntax-macros</a>                                   |
| 184 | llvm9-project-rvp              | <a href="https://github.com/nthu-llab/llvm9-project-rvp">https://github.com/nthu-llab/llvm9-project-rvp</a>                                       |
| 185 | OLLVM-9.0.1                    | <a href="https://github.com/o2e/OLLVM-9.0.1">https://github.com/o2e/OLLVM-9.0.1</a>                                                               |
| 186 | opencilk-project               | <a href="https://github.com/OpenCilk/opencilk-project">https://github.com/OpenCilk/opencilk-project</a>                                           |
| 187 | llvmlang                       | <a href="https://github.com/opencor/llvmlang">https://github.com/opencor/llvmlang</a>                                                             |
| 188 | LLVM_for_cpu0                  | <a href="https://github.com/P2Tree/LLVM_for_cpu0">https://github.com/P2Tree/LLVM_for_cpu0</a>                                                     |
| 189 | pacxx-llvm                     | <a href="https://github.com/pacxx/pacxx-llvm">https://github.com/pacxx/pacxx-llvm</a>                                                             |
| 190 | llvm-bitslicer                 | <a href="https://github.com/PaoloS02/llvm-bitslicer">https://github.com/PaoloS02/llvm-bitslicer</a>                                               |
| 191 | llvm-wasm-codesize             | <a href="https://github.com/paritytech/llvm-wasm-codesize">https://github.com/paritytech/llvm-wasm-codesize</a>                                   |
| 192 | android_llvm                   | <a href="https://github.com/paschalis-mpeis/android-llvm">https://github.com/paschalis-mpeis/android-llvm</a>                                     |
| 193 | external-llvmx                 | <a href="https://github.com/paschalis-mpeis/external-llvmx">https://github.com/paschalis-mpeis/external-llvmx</a>                                 |
| 194 | replace_function_name          | <a href="https://github.com/penguin-wwy/replace_function_name">https://github.com/penguin-wwy/replace_function_name</a>                           |
| 195 | llvm-C65-llvm                  | <a href="https://github.com/Peppar/llvm-C65">https://github.com/Peppar/llvm-C65</a>                                                               |
| 196 | restritification               | <a href="https://github.com/periclesroalves/restritification">https://github.com/periclesroalves/restritification</a>                             |
| 197 | runtime-pointer-disambiguation | <a href="https://github.com/periclesroalves/runtime-pointer-disambiguation">https://github.com/periclesroalves/runtime-pointer-disambiguation</a> |
| 198 | llvm-porting                   | <a href="https://github.com/phight305/llvm-porting">https://github.com/phight305/llvm-porting</a>                                                 |
| 199 | llvm-eud                       | <a href="https://github.com/phu54321/llvm-eud">https://github.com/phu54321/llvm-eud</a>                                                           |
| 200 | pacstack-llvm                  | <a href="https://github.com/pointer-authentication/pacstack-llvm">https://github.com/pointer-authentication/pacstack-llvm</a>                     |
| 201 | mlirx                          | <a href="https://github.com/polymage-labs/mlirx">https://github.com/polymage-labs/mlirx</a>                                                       |
| 202 | LLVM-ARCompact                 | <a href="https://github.com/pozorvlak/LLVM-ARCompact">https://github.com/pozorvlak/LLVM-ARCompact</a>                                             |
| 203 | llvm-branchpred                | <a href="https://github.com/pozorvlak/llvm-branchpred">https://github.com/pozorvlak/llvm-branchpred</a>                                           |
| 204 | rvv-llvm                       | <a href="https://github.com/pranav-prakash/rvv-llvm">https://github.com/pranav-prakash/rvv-llvm</a>                                               |
| 205 | llvm-security                  | <a href="https://github.com/prateeksahu/llvm-security">https://github.com/prateeksahu/llvm-security</a>                                           |
| 206 | llvmlocal                      | <a href="https://github.com/preejackie/llvmlocal">https://github.com/preejackie/llvmlocal</a>                                                     |
| 207 | llvm_TOY_backend               | <a href="https://github.com/Professor322/llvm_TOY_backend">https://github.com/Professor322/llvm_TOY_backend</a>                                   |
| 208 | LLVMFaultLoc                   | <a href="https://github.com/psuplus/LLVMFaultLoc">https://github.com/psuplus/LLVMFaultLoc</a>                                                     |
| 209 | llvm-obfuscator                | <a href="https://github.com/qtfreet00/llvm-obfuscator">https://github.com/qtfreet00/llvm-obfuscator</a>                                           |
| 210 | llvm-with-ms-abi-support       | <a href="https://github.com/r4start/llvm-with-ms-abi-support">https://github.com/r4start/llvm-with-ms-abi-support</a>                             |
| 211 | llvm-openisa                   | <a href="https://github.com/rafaelauler/llvm-openisa">https://github.com/rafaelauler/llvm-openisa</a>                                             |
| 212 | llvm-m88k                      | <a href="https://github.com/redstar/llvm-m88k">https://github.com/redstar/llvm-m88k</a>                                                           |
| 213 | platform_external_llvm90       | <a href="https://github.com/remote-android/platform_external_llvm90">https://github.com/remote-android/platform_external_llvm90</a>               |
| 214 | llvm-revec                     | <a href="https://github.com/revec/llvm-revec">https://github.com/revec/llvm-revec</a>                                                             |
| 215 | caver-llvm                     | <a href="https://github.com/rgov/caver-llvm">https://github.com/rgov/caver-llvm</a>                                                               |
| 216 | toolchain-llvm-project         | <a href="https://github.com/riscv-android-src/toolchain-llvm-project">https://github.com/riscv-android-src/toolchain-llvm-project</a>             |
| 217 | llvmCopy                       | <a href="https://github.com/ritesh2212/llvmCopy">https://github.com/ritesh2212/llvmCopy</a>                                                       |
| 218 | llvm-slicer                    | <a href="https://github.com/Rj1ng/llvm-slicer">https://github.com/Rj1ng/llvm-slicer</a>                                                           |
| 219 | amd-llvm-project               | <a href="https://github.com/ROCm/amd-llvm-project">https://github.com/ROCm/amd-llvm-project</a>                                                   |
| 220 | Armarities                     | <a href="https://github.com/romangol/Armarities">https://github.com/romangol/Armarities</a>                                                       |
| 221 | miniat-LLVM-backend            | <a href="https://github.com/romejoe/miniat-LLVM-backend">https://github.com/romejoe/miniat-LLVM-backend</a>                                       |
| 222 | llvm-hcs                       | <a href="https://github.com/ruijiefang/llvm-hcs">https://github.com/ruijiefang/llvm-hcs</a>                                                       |
| 223 | LLVM-WCET-SWEET                | <a href="https://github.com/rveens/LLVM-WCET-SWEET">https://github.com/rveens/LLVM-WCET-SWEET</a>                                                 |
| 224 | TeeRISC-Compiler               | <a href="https://github.com/samueldotj/TeeRISC-Compiler">https://github.com/samueldotj/TeeRISC-Compiler</a>                                       |
| 225 | llvm-eclair                    | <a href="https://github.com/sarahemm/llvm-eclair">https://github.com/sarahemm/llvm-eclair</a>                                                     |
| 226 | wazuhl                         | <a href="https://github.com/SavchenkoValeriy/wazuhl">https://github.com/SavchenkoValeriy/wazuhl</a>                                               |
| 227 | dcpu16-llvm                    | <a href="https://github.com/sblom/dcpu16-llvm">https://github.com/sblom/dcpu16-llvm</a>                                                           |
| 228 | llvm-dsa                       | <a href="https://github.com/seahorn/llvm-dsa">https://github.com/seahorn/llvm-dsa</a>                                                             |
| 229 | multicompiler                  | <a href="https://github.com/secure-systems-lab/multicompiler">https://github.com/secure-systems-lab/multicompiler</a>                             |
| 230 | nacl-llvm                      | <a href="https://github.com/shravanrn/nacl-llvm">https://github.com/shravanrn/nacl-llvm</a>                                                       |
| 231 | platform_external_llvm         | <a href="https://github.com/shugaoye/platform_external_llvm">https://github.com/shugaoye/platform_external_llvm</a>                               |
| 232 | libclang                       | <a href="https://github.com/sighingnow/libclang">https://github.com/sighingnow/libclang</a>                                                       |
| 233 | RE-llvmA                       | <a href="https://github.com/siserin/RE-llvmA">https://github.com/siserin/RE-llvmA</a>                                                             |
| 234 | llvm-or1k                      | <a href="https://github.com/skristiansson/llvm-or1k">https://github.com/skristiansson/llvm-or1k</a>                                               |
| 235 | ollvm_test                     | <a href="https://github.com/SliverBullet5563/ollvm_test">https://github.com/SliverBullet5563/ollvm_test</a>                                       |
| 236 | llvm-prepo                     | <a href="https://github.com/SNSystems/llvm-prepo">https://github.com/SNSystems/llvm-prepo</a>                                                     |
| 237 | crellvm-llvm                   | <a href="https://github.com/snu-sf/crellvm-llvm">https://github.com/snu-sf/crellvm-llvm</a>                                                       |
| 238 | llvm-freeze                    | <a href="https://github.com/snu-sf/llvm-freeze">https://github.com/snu-sf/llvm-freeze</a>                                                         |
| 239 | llvm-twin                      | <a href="https://github.com/snu-sf/llvm-twin">https://github.com/snu-sf/llvm-twin</a>                                                             |
| 240 | llvm-offload-jetson            | <a href="https://github.com/sommerlukas/llvm-offload-jetson">https://github.com/sommerlukas/llvm-offload-jetson</a>                               |
| 241 | lsif-clang                     | <a href="https://github.com/sourcegraph/lsif-clang">https://github.com/sourcegraph/lsif-clang</a>                                                 |
| 242 | LLVMStackPU                    | <a href="https://github.com/StackDoubleFlow/LLVMStackPU">https://github.com/StackDoubleFlow/LLVMStackPU</a>                                       |
| 243 | mmix-llvm-backend              | <a href="https://github.com/stuij/llvm-backend">https://github.com/stuij/llvm-backend</a>                                                         |
| 244 | nacl-llvm-branches.llvm-trunk  | <a href="https://github.com/sungsujo/nacl-llvm-branches.llvm-trunk">https://github.com/sungsujo/nacl-llvm-branches.llvm-trunk</a>                 |
| 245 | CSE601                         | <a href="https://github.com/Systems-IIITD/CSE601">https://github.com/Systems-IIITD/CSE601</a>                                                     |
| 246 | patmos-llvm                    | <a href="https://github.com/t-crest/patmos-llvm">https://github.com/t-crest/patmos-llvm</a>                                                       |
| 247 | patmos-llvm-project            | <a href="https://github.com/t-crest/patmos-llvm-project">https://github.com/t-crest/patmos-llvm-project</a>                                       |

Continued on next page

– continued from previous page

| Idx | Repository                | URL                                                                                                                             |
|-----|---------------------------|---------------------------------------------------------------------------------------------------------------------------------|
| 248 | llvm-kernel               | <a href="https://github.com/thaolt/llvm-kernel">https://github.com/thaolt/llvm-kernel</a>                                       |
| 249 | llvm-mcsema               | <a href="https://github.com/thestr4ng3r/llvm-mcsema">https://github.com/thestr4ng3r/llvm-mcsema</a>                             |
| 250 | llvm-ppc750cl             | <a href="https://github.com/Tilka/llvm-ppc750cl">https://github.com/Tilka/llvm-ppc750cl</a>                                     |
| 251 | TON-Compiler              | <a href="https://github.com/ton-community/ton-compiler">https://github.com/ton-community/ton-compiler</a>                       |
| 252 | llvm-propeller2           | <a href="https://github.com/totalspectrum/llvm-propeller2">https://github.com/totalspectrum/llvm-propeller2</a>                 |
| 253 | llvm-sanitizer-tutorial   | <a href="https://github.com/trailofbits/llvm-sanitizer-tutorial">https://github.com/trailofbits/llvm-sanitizer-tutorial</a>     |
| 254 | llvm-tl45                 | <a href="https://github.com/transfer-learning/llvm-tl45">https://github.com/transfer-learning/llvm-tl45</a>                     |
| 255 | llvm-tricore              | <a href="https://github.com/TriDis/llvm-tricore">https://github.com/TriDis/llvm-tricore</a>                                     |
| 256 | llvm-andersen             | <a href="https://github.com/TristanSchmelcher/llvm-andersen">https://github.com/TristanSchmelcher/llvm-andersen</a>             |
| 257 | sycl                      | <a href="https://github.com/triSYCL/sycl">https://github.com/triSYCL/sycl</a>                                                   |
| 258 | ConflLVM                  | <a href="https://github.com/TrustedCloud/ConflLVM">https://github.com/TrustedCloud/ConflLVM</a>                                 |
| 259 | corev-llvm-project        | <a href="https://github.com/TrustedCloud/ConflLVM">https://github.com/TrustedCloud/ConflLVM</a>                                 |
| 260 | private-llvm              | <a href="https://github.com/TrustedCloud/private-llvm">https://github.com/TrustedCloud/private-llvm</a>                         |
| 261 | TaintLLVM                 | <a href="https://github.com/TrustedCloud/TaintLLVM">https://github.com/TrustedCloud/TaintLLVM</a>                               |
| 262 | esp-llvm                  | <a href="https://github.com/ucb-bar/esp-llvm">https://github.com/ucb-bar/esp-llvm</a>                                           |
| 263 | llvm-6-register-allocator | <a href="https://github.com/UsmanNadeem/llvm-6-register-allocator">https://github.com/UsmanNadeem/llvm-6-register-allocator</a> |
| 264 | ava-llvm                  | <a href="https://github.com/utcs-scea/ava-llvm">https://github.com/utcs-scea/ava-llvm</a>                                       |
| 265 | llvm-cahp                 | <a href="https://github.com/virtualesecureplatform/llvm-cahp">https://github.com/virtualesecureplatform/llvm-cahp</a>           |
| 266 | llvm-rv16k                | <a href="https://github.com/virtualesecureplatform/llvm-rv16k">https://github.com/virtualesecureplatform/llvm-rv16k</a>         |
| 267 | llvm-csv                  | <a href="https://github.com/vulder/llvm-csv">https://github.com/vulder/llvm-csv</a>                                             |
| 268 | accmut                    | <a href="https://github.com/wangbo15/accmut">https://github.com/wangbo15/accmut</a>                                             |
| 269 | android_external_llvm90   | <a href="https://github.com/waydroid/android_external_llvm90">https://github.com/waydroid/android_external_llvm90</a>           |
| 270 | pj-llvm                   | <a href="https://github.com/weliveindetail/pj-llvm">https://github.com/weliveindetail/pj-llvm</a>                               |
| 271 | llvm-study                | <a href="https://github.com/wierton/llvm-study">https://github.com/wierton/llvm-study</a>                                       |
| 272 | wimal                     | <a href="https://github.com/wimal-build/wimal">https://github.com/wimal-build/wimal</a>                                         |
| 273 | LLVM-HTO                  | <a href="https://github.com/wsmoses/LLVM-HTO">https://github.com/wsmoses/LLVM-HTO</a>                                           |
| 274 | Tapir-LLVM                | <a href="https://github.com/wsmoses/Tapir-LLVM">https://github.com/wsmoses/Tapir-LLVM</a>                                       |
| 275 | swift-Ollvm10             | <a href="https://github.com/WYK15/swift-Ollvm10">https://github.com/WYK15/swift-Ollvm10</a>                                     |
| 276 | swift-Ollvm11             | <a href="https://github.com/WYK15/swift-Ollvm11">https://github.com/WYK15/swift-Ollvm11</a>                                     |
| 277 | swift-Ollvm12             | <a href="https://github.com/WYK15/swift-Ollvm12">https://github.com/WYK15/swift-Ollvm12</a>                                     |
| 278 | external-llvm             | <a href="https://github.com/xhteam/external-llvm">https://github.com/xhteam/external-llvm</a>                                   |
| 279 | ollvm4.0-and-llvm9.0      | <a href="https://github.com/xiguayizu/ollvm4.0-and-llvm9.0">https://github.com/xiguayizu/ollvm4.0-and-llvm9.0</a>               |
| 280 | hls-llvm-project          | <a href="https://github.com/Xilinx/hls-llvm-project">https://github.com/Xilinx/hls-llvm-project</a>                             |
| 281 | xncm-llvm                 | <a href="https://github.com/xncm/xncm-llvm">https://github.com/xncm/xncm-llvm</a>                                               |
| 282 | TaintTracking             | <a href="https://github.com/yahnik/TaintTracking">https://github.com/yahnik/TaintTracking</a>                                   |
| 283 | ollvm-ttl                 | <a href="https://github.com/yazhiwang/ollvm-ttl">https://github.com/yazhiwang/ollvm-ttl</a>                                     |
| 284 | LLVM-obf                  | <a href="https://github.com/yeqingyan/LLVM-obf">https://github.com/yeqingyan/LLVM-obf</a>                                       |
| 285 | llvm-epiphany             | <a href="https://github.com/yingerj/llvm-epiphany">https://github.com/yingerj/llvm-epiphany</a>                                 |
| 286 | BsodSurvivor              | <a href="https://github.com/ykfre/BsodSurvivor">https://github.com/ykfre/BsodSurvivor</a>                                       |
| 287 | LLVM-SVE                  | <a href="https://github.com/yogeshlc/LLVM-SVE">https://github.com/yogeshlc/LLVM-SVE</a>                                         |
| 288 | zapcc                     | <a href="https://github.com/yrnkrn/zapcc">https://github.com/yrnkrn/zapcc</a>                                                   |
| 289 | llvm-rvex                 | <a href="https://github.com/zerokill/llvm-rvex">https://github.com/zerokill/llvm-rvex</a>                                       |
| 290 | llvm4pass                 | <a href="https://github.com/zhangkn/llvm4pass">https://github.com/zhangkn/llvm4pass</a>                                         |
| 291 | llvm-with-calls-to-souper | <a href="https://github.com/zhengyang92/llvm-with-calls-to-souper">https://github.com/zhengyang92/llvm-with-calls-to-souper</a> |
| 292 | LLVMMirror                | <a href="https://github.com/divot/LLVMMirror">https://github.com/divot/LLVMMirror</a>                                           |
| 293 | llvm-mirror               | <a href="https://github.com/earl/llvm-mirror">https://github.com/earl/llvm-mirror</a>                                           |
| 294 | llvmnew                   | <a href="https://github.com/preejackie/llvmnew">https://github.com/preejackie/llvmnew</a>                                       |
| 295 | LLVM-r                    | <a href="https://github.com/MPSLab-ASU/LLVM-r">https://github.com/MPSLab-ASU/LLVM-r</a>                                         |
| 296 | llvm-ssa                  | <a href="https://github.com/leissa/llvm-ssa">https://github.com/leissa/llvm-ssa</a>                                             |
